# Supplementary material for: Interactions between SAP155 and FUSE-Binding Protein-Interacting Repressor Bridges c-Myc and P27Kip1 Expression
Source: Oxford University Press journal article supplement (doi:10.1158/1541-7786.mcr-12-0673), 2013-04-18
Supplement: 15417786mcr120673-sup-tab3.xlsx [file 15417786mcr120673-sup-tab3.xlsx]

## Sheet: Sheet1
Supplementary Table 3. Patients' characteristics, their tumor features and disease prognosis.
case number	age at operation	gender	location	size (cm)	pathology	Dukes stages	outcome	survival days convinced
39	53	Male	Rectum	3.5x6	well	B	alive	4036
42	43	Female	Rectum	3.1x2.8	mod	C	unknown	1994
49	58	Female	Cecum	3.5x6	mod	B	unknown	3020
37	49	Male	Rectum	6.5x4.5	mod	C	alive	4052
62	39	Female	Rectum	3x3	mod	C	unknown	1819
64	48	Female	Descending	4x5.5	mod	C	unknown	3281
59	50	Male	Rectum	2x3	muc	D	unknown	257
45	55	Male	Rectum	2.5x2	mod	D	unknown	153
93	72	Male	Sigmoid	3.5x6	mod	D	unknown	201
65	68	Male	Sigmoid	5x4	mod	C	alive	3835
54	82	Male	Ascending	2.5x2.5	mod	C	unknown	1460
55	77	Female	Ascending	12x5	mod	A	unknown	265
40	61	Male	Rectum	4.5x4.5	mod	C	alive	3990
